# Supplementary material
Source: PubMed Central journal article supplement (PMC3334283)
Supplement: NIHMS369693-supplement-suppl.pdf [file NIHMS369693-supplement-suppl.pdf]

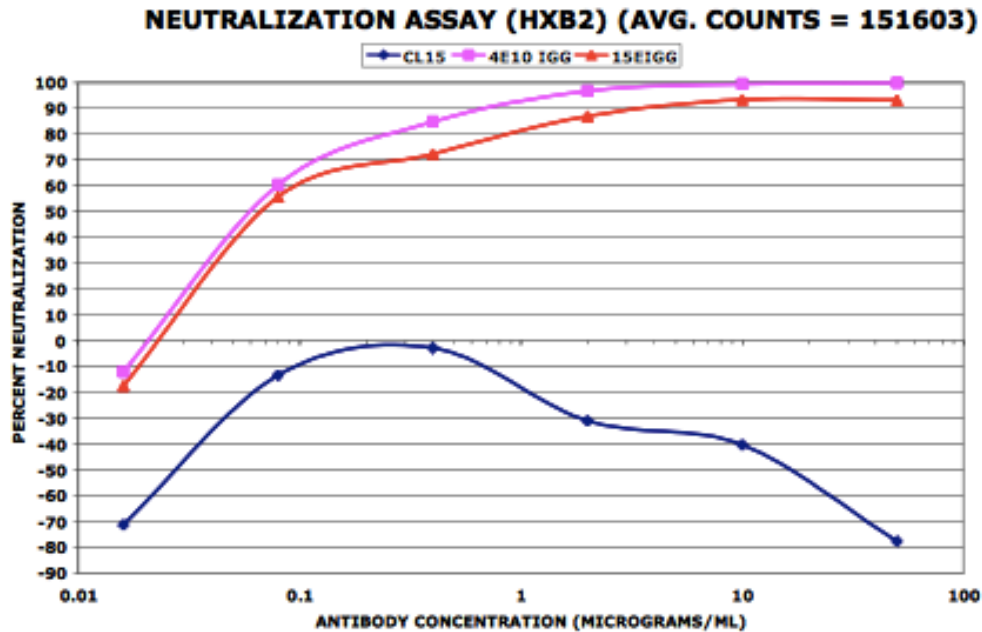

**Supplemental Figure S1.** Neutralization of HIV-1 strain HxB2 by MAbs 2F5, 4E10 and CL15. Recombinant HIV-1<sub>HxB2</sub> virions, competent for a single round of infection, were generated using the luciferase reporter plasmid pNL4-3.Luc.R-E-, as described previously [2, 8]. The pseudotyped virus was assayed for neutralization using U87.CD4.CXCR4 target cells. MAbs were diluted and added (1:1 by volume) to HIV-1, and pre-incubated for 1 hour at 37°C. The mixture of MAb and HIV-1 was then added (1:1 by volume) to the target cells, and the assay was developed using luciferase reagent (Promega) following a 72 hour incubation at 37°C. The degree of virus neutralization was determined as a percentage reduction of viral infectivity against an antibody-free control. The experiment was performed in triplicate.

**BSA**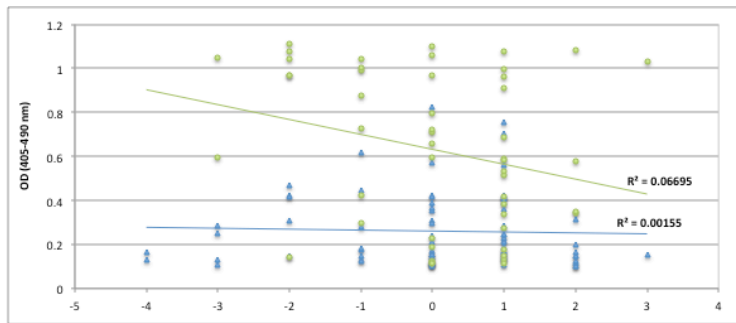**FCS**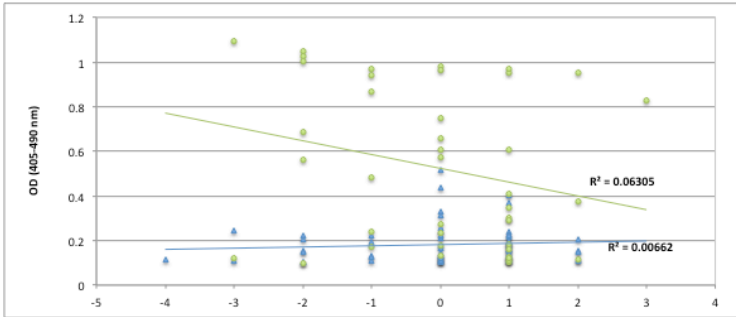**DM**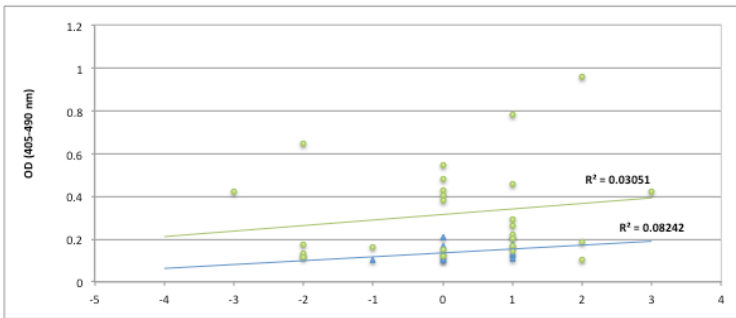**Peptide Net Charge**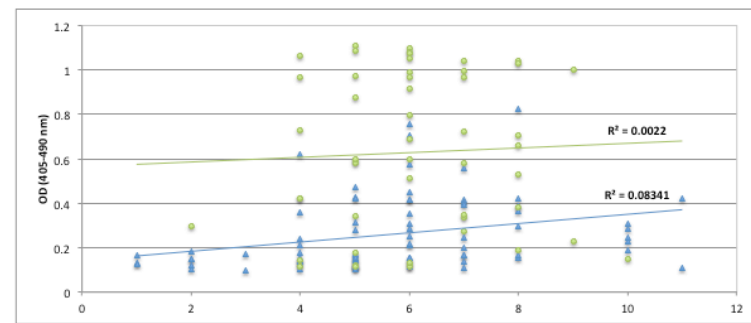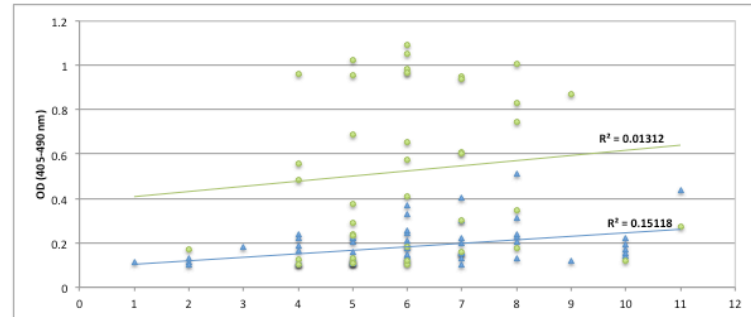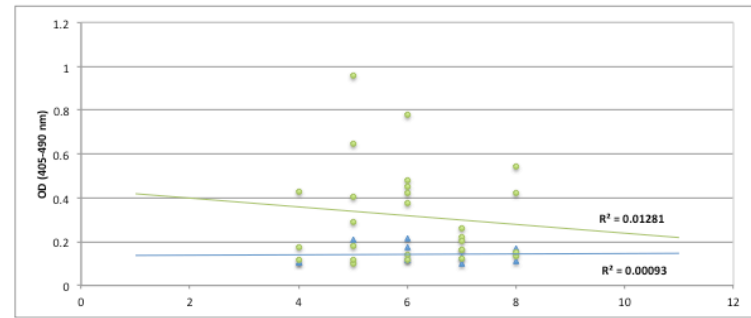**Number of Hydrophobic Residues**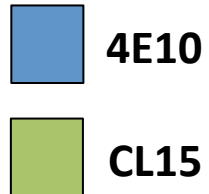

**Supplemental Figure S2.** Linear regression analysis of ELISA reactivity of MAbs 4E10 and CL15 with HIV-1 MN Env peptides (text Fig. 2) vs. peptide net charge (left) and number of hydrophobic amino acids (right). In 5% bovine serum albumin (BSA) and 50% fetal calf serum (FCS), MAb CL15 binding (but not MAb 4E10 binding) is associated with peptide net negative charge; in 5% dried milk (DM) there is no such association. For the purposes of this figure, the set of hydrophobic amino acids includes C, F, I, L, M, V and W. Only peptides bound by each MAb with O.D. > 0.1 were included in the analysis.

(A)

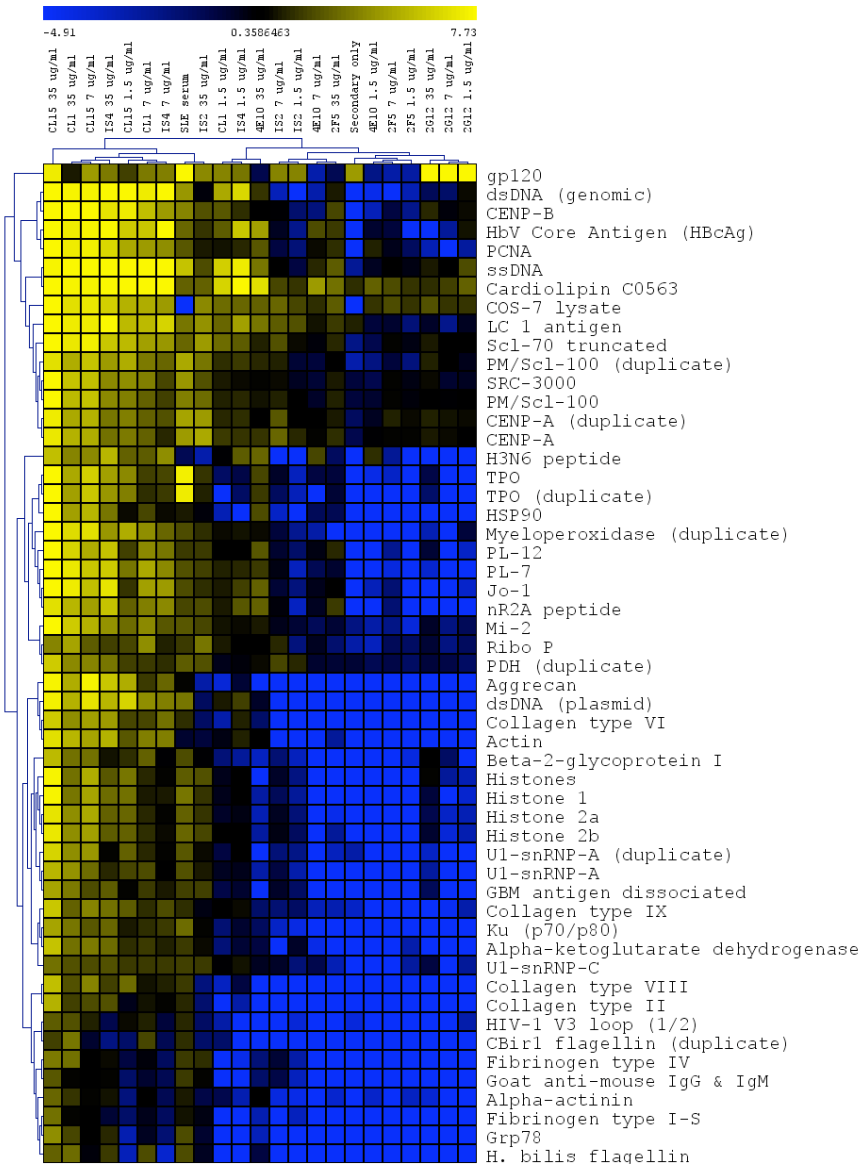

(B)

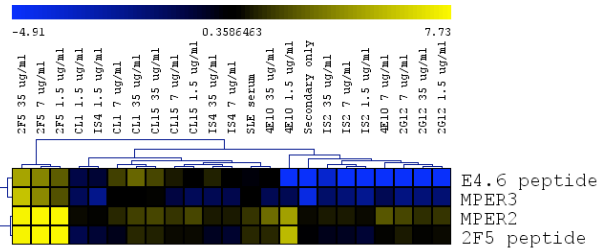

Supplemental Figure S3. Hierarchical clustering of the reactivity of all MAb with only those antigens bound significantly differently by MAb CL15 and 2F5. (A) CL15 > 2F5 significant antigens. (B) 2F5 > CL15 significant antigens. The order of antigens is based on overall reactivity similarities across all MAb.

(A)

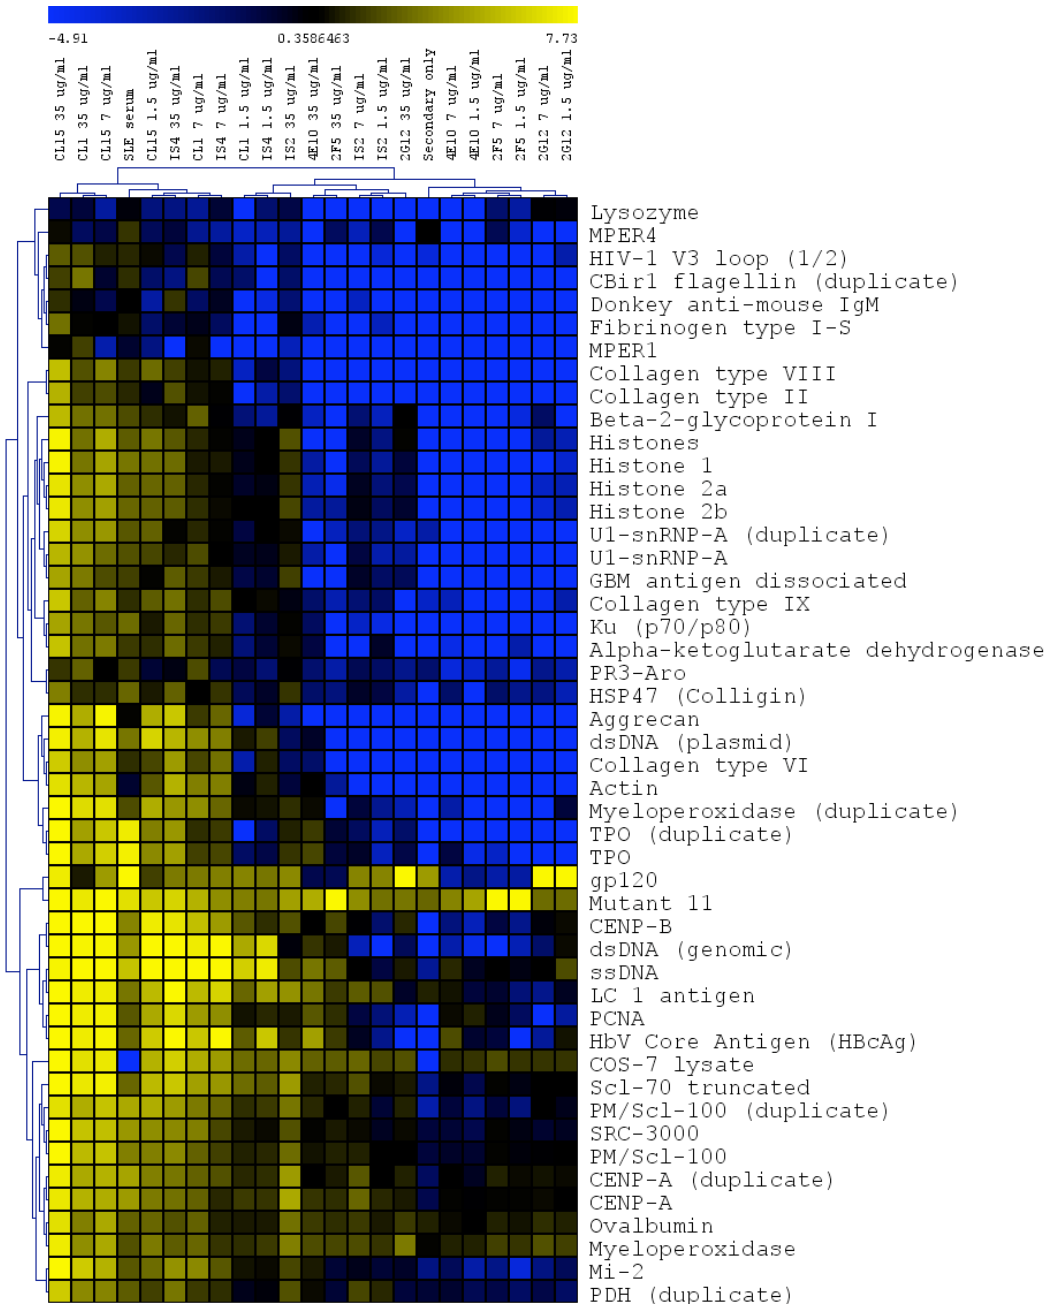

(B)

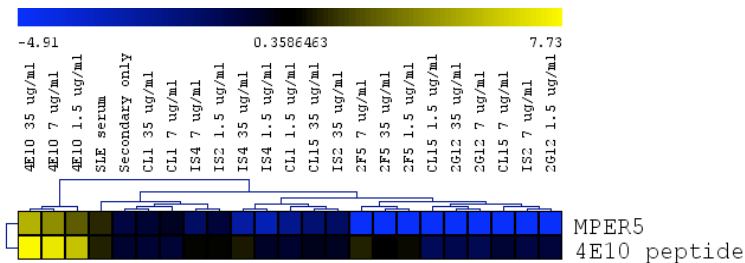

Supplemental figure S4. Hierarchical clustering of the reactivity of all MABs with only those antigens bound significantly differently by MABs CL15 and 4E10. (A) CL15 > 4E10 significant antigens. (B) 4E10 > CL15 significant antigens. The order of antigens is based on overall reactivity similarities across all MABs.

(A)

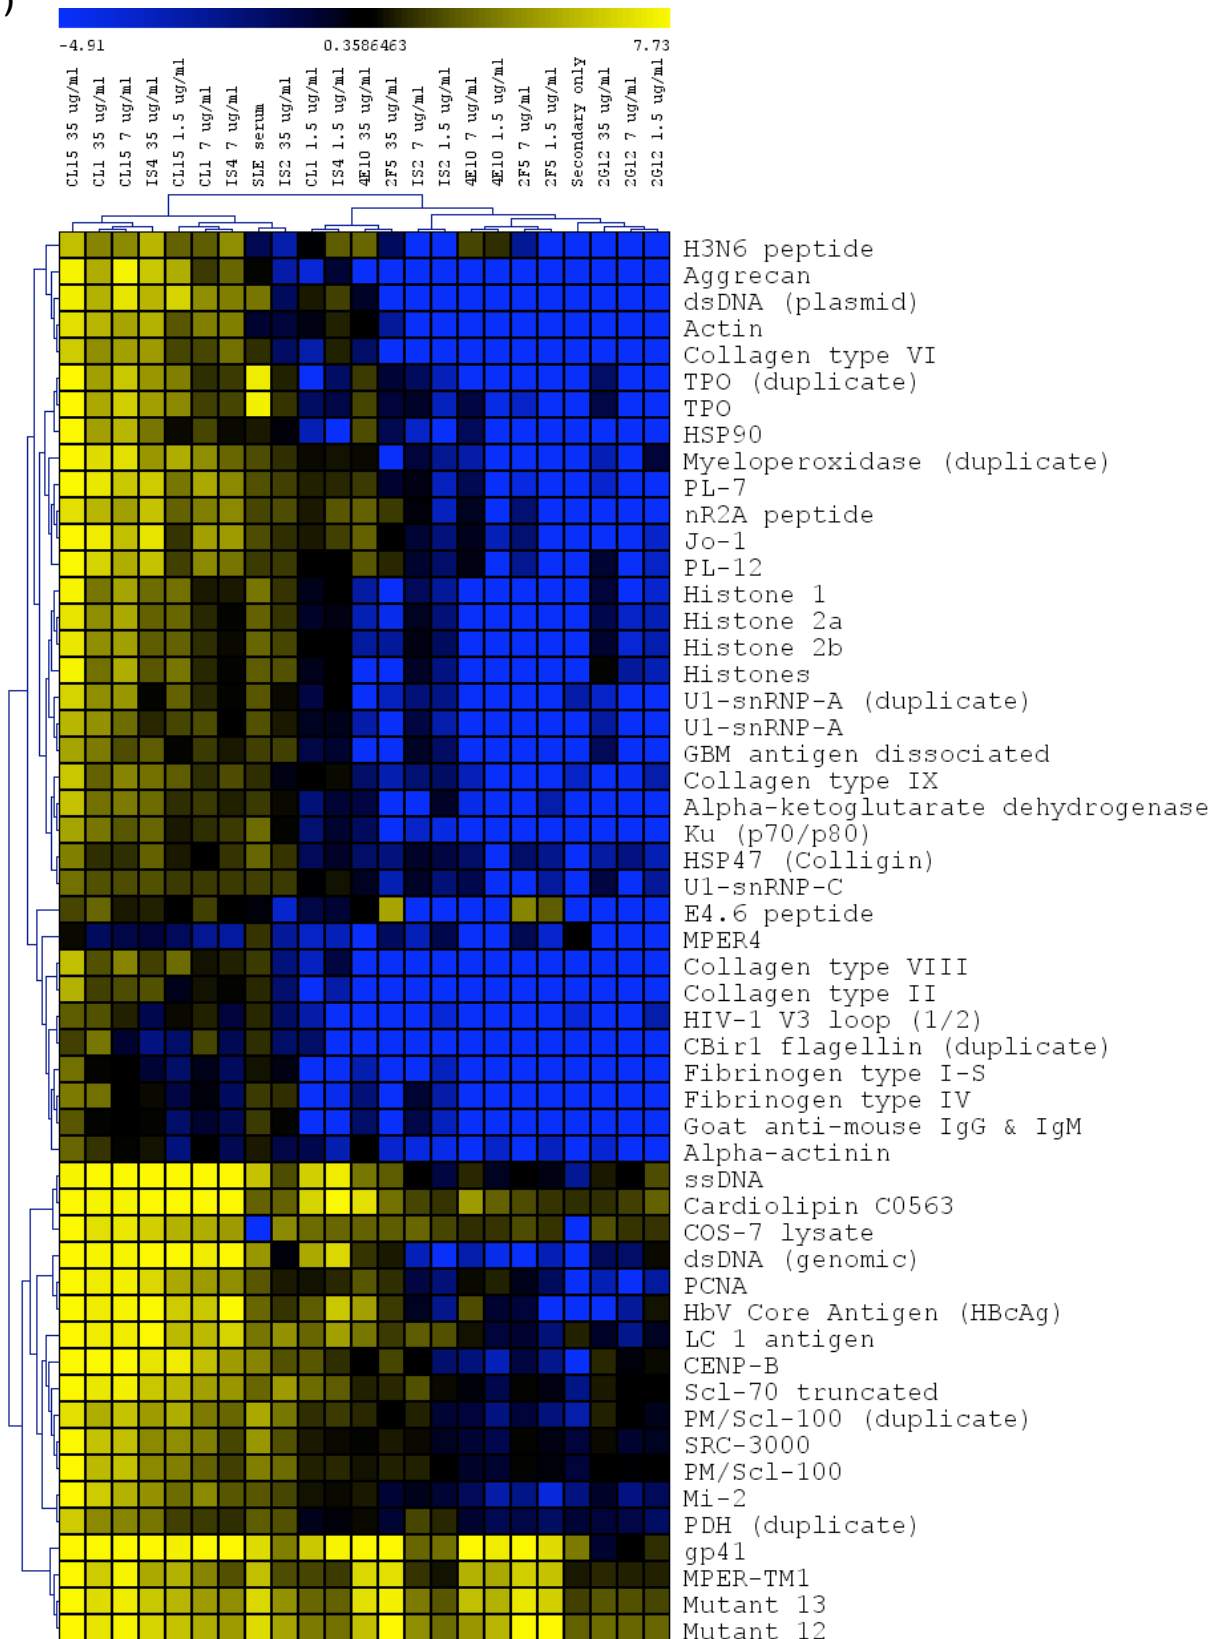

Supplemental figure S5. Hierarchical clustering of the reactivity of all MAbs with only those antigens bound significantly better by MAb CL15 in comparison with MAb 2G12. The order of antigens is based on overall reactivity similarities across all MAbs.

(A)

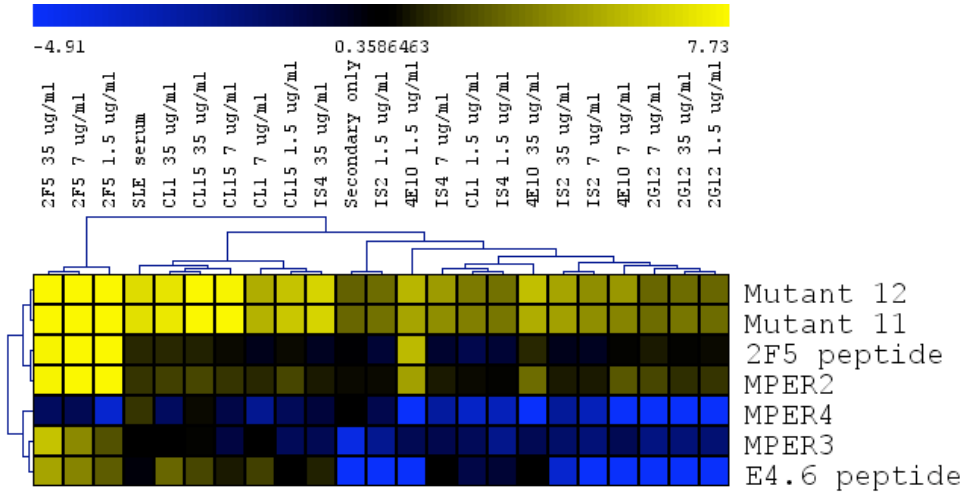

(B)

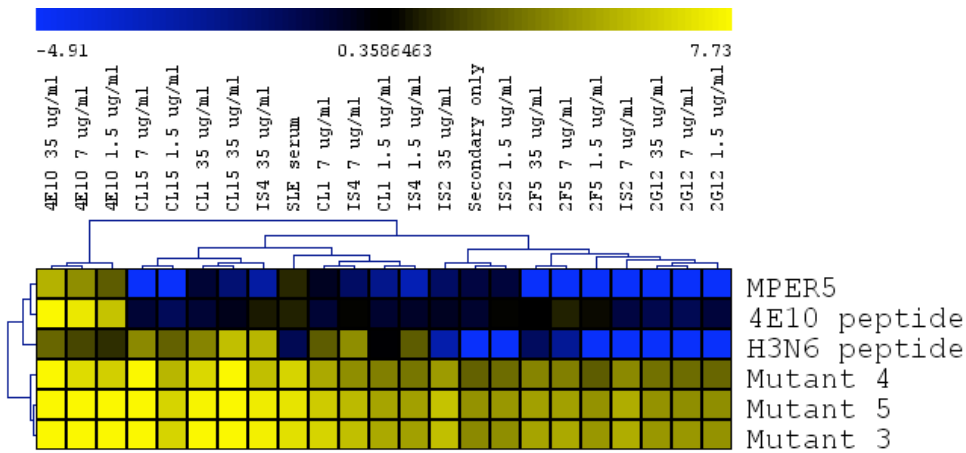

Supplemental figure S6. Hierarchical clustering of the reactivity of all MABs with only those antigens bound significantly differently by MABs 2F5 and 4E10. (A) 2F5 > 4E10 significant antigens. (B) 4E10 > 2F5 significant antigens. The order of antigens is based on overall reactivity similarities across all MABs.

Supplemental Figure S7A. Color version of text Figure 3A.

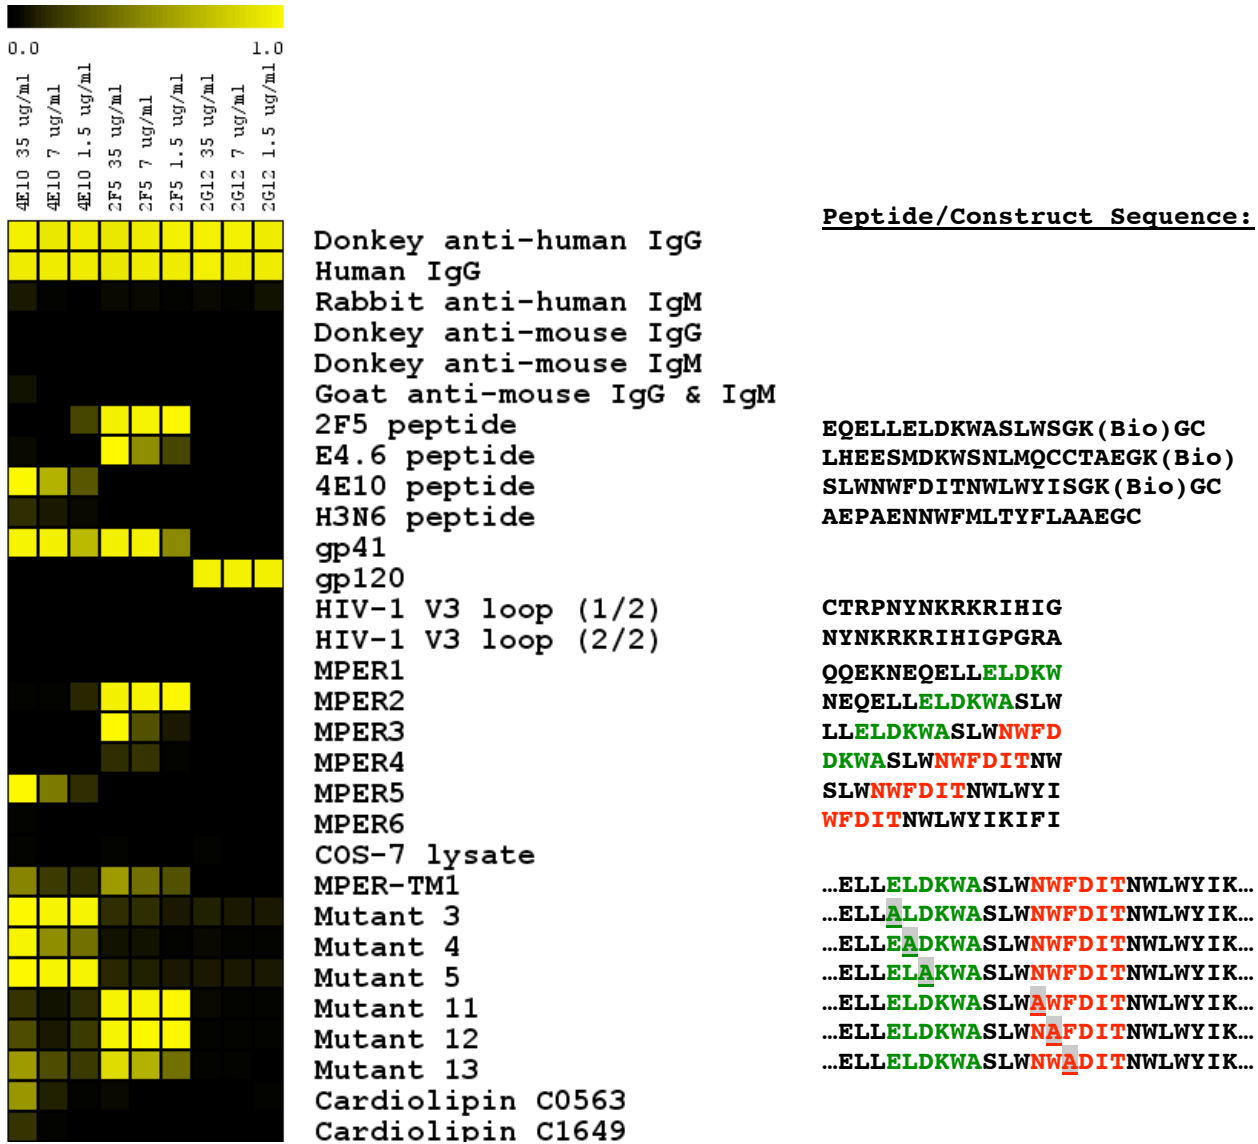





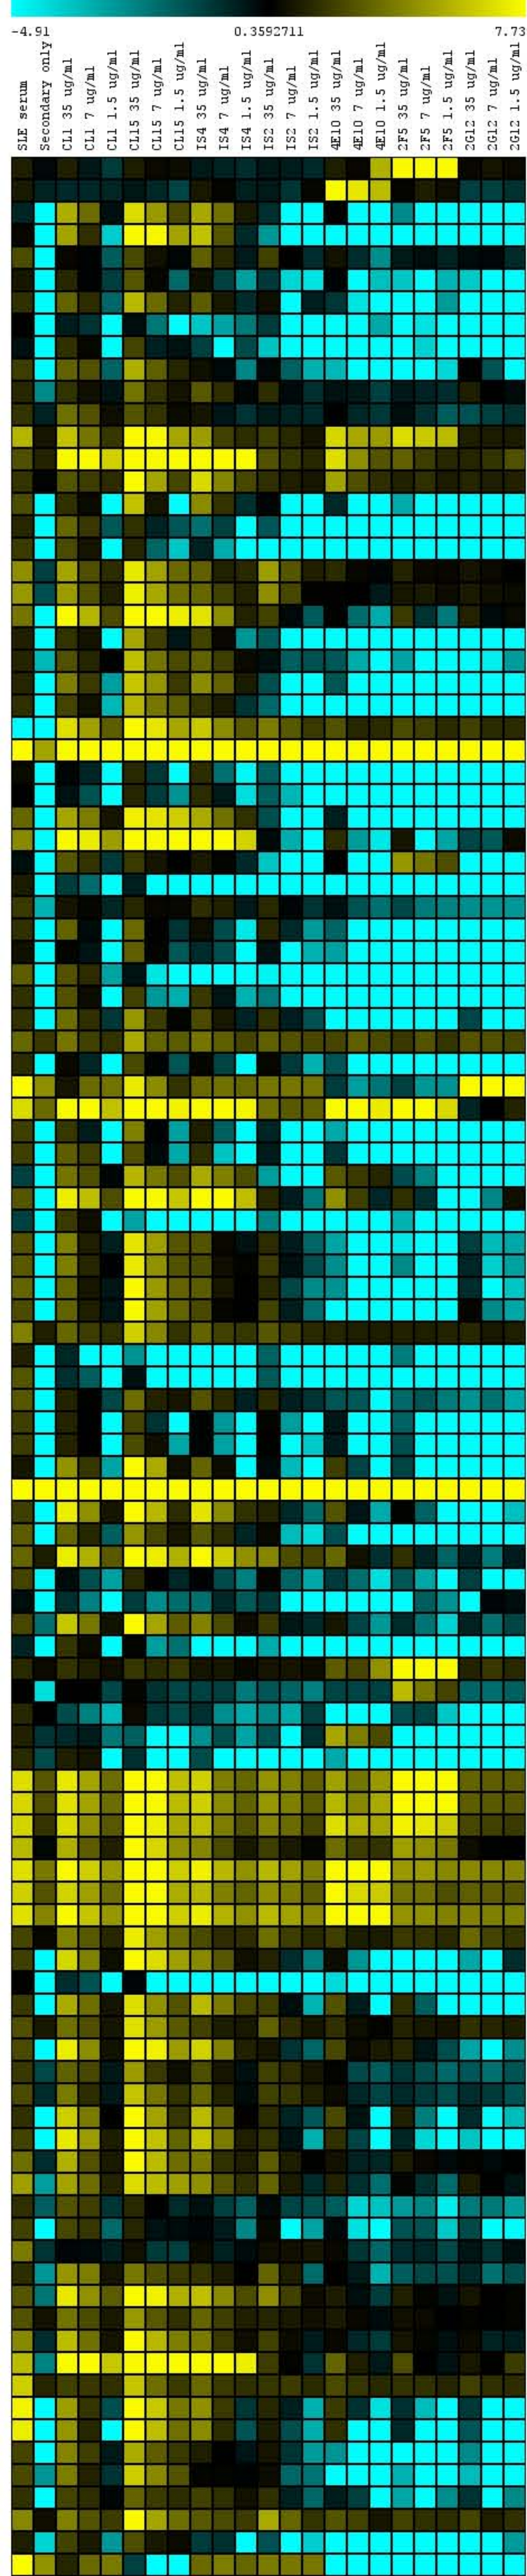

- 2F5 peptide
- 4E10 peptide
- Actin
- Aggrecan
- Aldolase Type X
- Alpha-actinin
- Alpha-ketoglutarate dehydrogenase
- Azurocidin
- B2.1 peptide
- Beta-2-glycoprotein I
- BPI
- BSA
- C1-TM1
- Cardiolipin C0563
- Cardiolipin C1649
- CBir1 flagellin
- CBir1 flagellin (duplicate)
- CBir1 flagellin (amino-terminal fragment)
- CENP-A
- CENP-A (duplicate)
- CENP-B
- Collagen type II
- Collagen type IX
- Collagen type VI
- Collagen type VIII
- COS-7 lysate
- Donkey anti-human IgG
- Donkey anti-mouse IgG
- Donkey anti-mouse IgM
- dsDNA (plasmid)
- dsDNA (genomic)
- E4.6 peptide
- EBNA-1
- Enolase
- Fibrinogen type IV
- Fibrinogen type I-S
- Fla\_X flagellin (amino-terminal fragment)
- Fla\_X flagellin
- GBM antigen dissociated
- GBM antigen undissociated
- Goat anti-mouse IgG & IgM
- gp120
- gp41
- Grp78
- H. bilis flagellin
- H3N6 peptide
- HbV Core Antigen (HBcAg)
- Heparan sulfate sodium salt
- Histone 2a
- Histone 2b
- Histone 1
- Histones
- Histones (duplicate)
- HSP60
- HSP25
- HSP47 (Colligin)
- HSP70
- HSP70 (duplicate)
- HSP90
- Human IgG
- Jo-1
- Ku (p70/p80)
- LC 1 antigen
- LKM 1 antigen
- Lysozyme
- Mi-2
- MPER
- MPER2
- MPER3
- MPER4
- MPER5
- MPER6
- Mutant 11
- Mutant 12
- Mutant 13
- Mutant 19
- Mutant 3
- Mutant 4
- Mutant 5
- Myeloperoxidase
- Myeloperoxidase (duplicate)
- Myosin
- nR2A peptide
- Ovalbumin
- PCNA
- PDH
- PDH (duplicate)
- PL-12
- PL-7
- PM/Scl-100
- PM/Scl-100 (duplicate)
- PR3-Aro
- PR3-IV
- Rabbit anti-human IgM
- Ribo P
- Scl-70 truncated
- SMA-3000
- SRC-3000
- ssDNA
- Thyroglobulin
- TPO
- TPO (duplicate)
- U1-snRNP-A
- U1-snRNP-A (duplicate)
- U1-snRNP-C
- U-snRNP-B/B'
- HIV-1 V3 loop (1/2)
- HIV-1 V3 loop (2/2)



Supplemental Table S1. Description and sources of microarray antigens.

| Antigen                                   | Description                                                                                                | Source                                                         | Reference |
|-------------------------------------------|------------------------------------------------------------------------------------------------------------|----------------------------------------------------------------|-----------|
| Donkey anti-human IgG                     | Secondary antibody produced in donkey                                                                      | Jackson                                                        |           |
| Human IgG                                 | Human IgG purified from serum                                                                              | Jackson                                                        |           |
| Rabbit anti-human IgM                     | Secondary antibody produced in rabbit                                                                      | Jackson                                                        |           |
| Donkey anti-mouse IgG                     | Secondary antibody produced in donkey                                                                      | Jackson                                                        |           |
| Donkey anti-mouse IgM                     | Secondary antibody produced in donkey                                                                      | Jackson                                                        |           |
| Goat anti-mouse IgG & IgM                 | Secondary antibody produced in goat                                                                        | Jackson                                                        |           |
| 2F5 peptide                               | Peptide bearing 2F5 gp41 epitope (sequence EQELLELDKWASLWSGK(Bio)GC)                                       | NeoMPS                                                         | 5         |
| E4.6 peptide                              | Peptide selected by MAb 2F5 from phage-displayed library                                                   | NeoMPS                                                         | 5         |
| 4E10 peptide                              | Peptide bearing 4E10 gp41 epitope (sequence SLWNWFDITNWLWYISGK(Bio)GC)                                     | UBC NAPS Unit                                                  | 1         |
| H3N6 peptide                              | Peptide selected by MAb 4E10 from phage-displayed library                                                  | EZBiolab                                                       | 1,7       |
| gp120                                     | HIV envelope glycoprotein 120, recombinant                                                                 | ImmunoDiagnostics                                              |           |
| gp41                                      | HIV envelope glycoprotein 41, recombinant                                                                  | ImmunoDiagnostics                                              |           |
| HIV-1 V3 loop (1/2)                       | Peptide from HIV strain MN gp120 (sequence CTRPNYNKRRIHIG; catalogue number 6284)                          | NIH AIDS Research & Reference Reagent Program                  |           |
| HIV-1 V3 loop (2/2)                       | Peptide from HIV strain MN gp120 (sequence NYNKRRIHIGPGRA; catalogue number 6285)                          | NIH AIDS Research & Reference Reagent Program                  |           |
| MPER                                      | Peptide composed of aa 652-666 of HIV strain MN gp41 (sequence QQEKNEQELLELDKW)                            | NIH AIDS Research & Reference Reagent Program                  |           |
| MPER2                                     | Peptide composed of aa 656-670 of HIV strain MN gp41 (sequence NEQELLELDKWASLW)                            | NIH AIDS Research & Reference Reagent Program                  |           |
| MPER3                                     | Peptide composed of aa 660-674 of HIV strain MN gp41 (sequence LLELDKWASLWNWFD)                            | NIH AIDS Research & Reference Reagent Program                  |           |
| MPER4                                     | Peptide composed of aa 664-678 of HIV strain MN gp41 (sequence DKWASLWNWFDITNW)                            | NIH AIDS Research & Reference Reagent Program                  |           |
| MPER5                                     | Peptide composed of aa 668-682 of HIV strain MN gp41 (sequence SLWNWFDITNWLWYI)                            | NIH AIDS Research & Reference Reagent Program                  |           |
| MPER6                                     | Peptide composed of aa 672-686 of HIV strain MN gp41 (sequence WFDITNWLWYIKFI)                             | NIH AIDS Research & Reference Reagent Program                  |           |
| COS-7 lysate                              | COS-7 cell lysate (African green monkey)                                                                   | Gift from Dr. Marinieve Montero (Simon Fraser University)      | 6         |
| MPER-TM1                                  | Lysate from COS-7 cells transfected with DNA construct encoding aa 643-732 of HIV gp41                     | Gift from Dr. Marinieve Montero (Simon Fraser University)      | 6         |
| Mutant 3                                  | Lysate from COS-7 cells transfected with DNA construct encoding aa 643-732 of HIV gp41 with E662A mutation | Gift from Dr. Marinieve Montero (Simon Fraser University)      | 6         |
| Mutant 4                                  | Lysate from COS-7 cells transfected with DNA construct encoding aa 643-732 of HIV gp41 with L663A mutation | Gift from Dr. Marinieve Montero (Simon Fraser University)      | 6         |
| Mutant 5                                  | Lysate from COS-7 cells transfected with DNA construct encoding aa 643-732 of HIV gp41 with D664A mutation | Gift from Dr. Marinieve Montero (Simon Fraser University)      | 6         |
| Mutant 11                                 | Lysate from COS-7 cells transfected with DNA construct encoding aa 643-732 of HIV gp41 with N671A mutation | Gift from Dr. Marinieve Montero (Simon Fraser University)      | 6         |
| Mutant 12                                 | Lysate from COS-7 cells transfected with DNA construct encoding aa 643-732 of HIV gp41 with W672A mutation | Gift from Dr. Marinieve Montero (Simon Fraser University)      | 6         |
| Mutant 13                                 | Lysate from COS-7 cells transfected with DNA construct encoding aa 643-732 of HIV gp41 with F673A mutation | Gift from Dr. Marinieve Montero (Simon Fraser University)      | 6         |
| Actin                                     | Rabbit muscle actin                                                                                        | Molecular Probes                                               |           |
| Aggrecan                                  | Bovine articular cartilage aggrecan                                                                        | Sigma                                                          |           |
| Aldolase Type X                           | Rabbit muscle aldolase                                                                                     | Sigma                                                          |           |
| Alpha-actinin                             | Chicken gizzard alpha-actinin                                                                              | Sigma                                                          |           |
| Alpha-ketoglutarate dehydrogenase         | Alpha-ketoglutarate dehydrogenase purified from porcine heart                                              | Sigma                                                          |           |
| Azurocidin                                | Human azurocidin from whole blood                                                                          | The Binding Site                                               |           |
| Beta-2-glycoprotein I                     | Human $\beta$ -2-glycoprotein I, recombinant, His-tagged                                                   | Diarect                                                        |           |
| BPI                                       | Human bactericidal permeability-increasing protein purified from whole blood                               | The Binding Site                                               |           |
| BSA                                       | Purified bovine serum albumin                                                                              | Sigma                                                          |           |
| CBir1 flagellin                           | Flagellin clone from enteric bacteria of the <i>Clostridium</i> <i>coccoides</i> group                     | Gift from Dr. Charles Elson (University of Alabama-Birmingham) | 3         |
| CBir1 flagellin (duplicate)               | Flagellin clone from enteric bacteria of the <i>Clostridium</i> <i>coccoides</i> group                     | Gift from Dr. Charles Elson (University of Alabama-Birmingham) | 3         |
| Cardiolipin C0563                         | Cardiolipin sodium salt from bovine heart                                                                  | Sigma                                                          |           |
| Cardiolipin C1649                         | Cardiolipin solution in ethanol from bovine heart                                                          | Sigma                                                          |           |
| CBir1 flagellin (amino-terminal fragment) | Flagellin clone from enteric bacteria of the <i>Clostridium</i> <i>coccoides</i> group                     | Gift from Dr. Charles Elson (University of Alabama-Birmingham) | 3         |
| CENP-A                                    | Human centromere protein A, recombinant, His-tagged                                                        | Diarect                                                        |           |
| CENP-A (duplicate)                        | Human centromere protein A, recombinant, His-tagged                                                        | Diarect                                                        |           |
| CENP-B                                    | Human centromere protein B, recombinant, His-tagged                                                        | Diarect                                                        |           |
| Collagen type II                          | Bovine collagen type II from tracheal cartilage                                                            | Sigma                                                          |           |
| Collagen type IX                          | Human collagen type IX from placenta                                                                       | Sigma                                                          |           |
| Collagen type VI                          | Human collagen type VI from placenta                                                                       | Sigma                                                          |           |
| Collagen type VIII                        | Human collagen type VIII from placenta                                                                     | Sigma                                                          |           |
| dsDNA (plasmid)                           | 3.4 kb <i>E. coli</i> plasmid DNA                                                                          | Diarect                                                        |           |
| dsDNA (genomic)                           | Salmon testes genomic DNA                                                                                  | Sigma                                                          |           |
| EBNA-1                                    | Epstein-Barr nuclear antigen 1 (synthetic peptide comprising aa 398-412, sequence PPPGRRRPFHPVGEA)         | Sigma                                                          |           |
| Enolase                                   | Rabbit muscle enolase                                                                                      | Sigma                                                          |           |

(continued)

| Antigen                                   | Description                                                                                         | Source                                                         | Reference |
|-------------------------------------------|-----------------------------------------------------------------------------------------------------|----------------------------------------------------------------|-----------|
| Fibrinogen type IV                        | Fibrinogen type IV purified from bovine plasma                                                      | Sigma                                                          |           |
| Fibrinogen type I-S                       | Fibrinogen type I purified from bovine plasma                                                       | Sigma                                                          |           |
| Fla_X flagellin (amino-terminal fragment) | Flagellin clone from enteric bacteria of the <i>Clostridium coccooides</i> group                    | Gift from Dr. Charles Elson (University of Alabama-Birmingham) | 3         |
| Fla_X flagellin                           | Flagellin clone from enteric bacteria of the <i>Clostridium coccooides</i> group                    | Gift from Dr. Charles Elson (University of Alabama-Birmingham) | 3         |
| GBM antigen dissociated                   | Dissociated human glomerular basement membrane antigen, recombinant, His-tagged                     | Diarect                                                        |           |
| GBM antigen undissociated                 | Undissociated human glomerular basement membrane antigen, recombinant, His-tagged                   | Diarect                                                        |           |
| Grp78                                     | Hamster glucose-regulated protein 78, recombinant                                                   | Stressgen                                                      |           |
| <i>H. bilis</i> flagellin                 | Flagellins purified from <i>Helicobacter bilis</i> cultures                                         | Gift from Dr. Charles Elson (University of Alabama-Birmingham) | 4         |
| HbV Core Antigen (HBcAg)                  | Hepatitis B virus core antigen, recombinant                                                         | Sigma                                                          |           |
| Heparan sulfate sodium salt               | Heparan sulfate, from bovine kidney                                                                 | Sigma                                                          |           |
| Histone 2a                                | Histone 2a from bovine thymus tissue                                                                | Immunovision                                                   |           |
| Histone 2b                                | Histone 2b from bovine thymus tissue                                                                | Immunovision                                                   |           |
| Histone 1                                 | Histone 1 from bovine thymus tissue                                                                 | Immunovision                                                   |           |
| Histones                                  | Whole histones purified from chicken red blood cells                                                | Immunovision                                                   |           |
| Histones (duplicate)                      | Whole histones purified from chicken red blood cells                                                | Immunovision                                                   |           |
| HSP60                                     | Human heat shock protein 60, recombinant                                                            | Stressgen                                                      |           |
| HSP25                                     | Murine heat shock protein 25, recombinant                                                           | Stressgen                                                      |           |
| HSP47 (Colligin)                          | Human heat shock protein 47, recombinant                                                            | Stressgen                                                      |           |
| HSP70                                     | Human heat shock protein 70, recombinant                                                            | Stressgen                                                      |           |
| HSP70 (duplicate)                         | Human heat shock protein 70, recombinant                                                            | Stressgen                                                      |           |
| HSP90                                     | Human heat shock protein 90, from HeLa cells                                                        | Stressgen                                                      |           |
| Jo-1                                      | Human histidyl-tRNA synthetase (Jo-1), recombinant, His-tagged                                      | Diarect                                                        |           |
| Ku (p70/p80)                              | Human Ku, recombinant, His-tagged                                                                   | Diarect                                                        |           |
| LC 1 antigen                              | Human formiminotransferase cyclodeaminase (liver cytosol antigen type 1), recombinant               | Diarect                                                        |           |
| LKM 1 antigen                             | Human cytochrome P450 2D6 (liver kidney microsomal antigen 1), recombinant                          | Diarect                                                        |           |
| Lysozyme                                  | Human lysozyme from whole blood                                                                     | The Binding Site                                               |           |
| Mi-2                                      | Human Mi-2 $\beta$ nuclear antigen, recombinant                                                     | Diarect                                                        |           |
| Myeloperoxidase                           | Myeloperoxidase (pANCA antigen) from human promyelocytic cell line                                  | ImmunoVision                                                   |           |
| Myeloperoxidase (duplicate)               | Myeloperoxidase (pANCA antigen) from human neutrophils                                              | Biodesign                                                      |           |
| Myosin                                    | Myosin, calcium-activated, from rabbit muscle                                                       | Sigma                                                          |           |
| nR2A peptide                              | NR2A (glutamate/N-methyl-D-aspartic acid (NMDA) receptor subunit) peptide, sequence SVSYDDWDYSLEARV | Sigma                                                          |           |
| Ovalbumin                                 | Albumin from chicken egg white                                                                      | Sigma                                                          |           |
| PCNA                                      | Human proliferating cell nuclear antigen, recombinant, His-tagged                                   | Diarect                                                        |           |
| PDH                                       | Pyruvate dehydrogenase purified from porcine heart                                                  | Sigma                                                          |           |
| PDH (duplicate)                           | Pyruvate dehydrogenase purified from porcine heart                                                  | Sigma                                                          |           |
| PL-12                                     | Human alanyl-tRNA synthetase, recombinant, His-tagged                                               | Diarect                                                        |           |
| PL-7                                      | Human threonyl-tRNA synthetase, recombinant, His-tagged                                             | Diarect                                                        |           |
| PM/ScI-100                                | Human PM/ScI-100, recombinant, His-tagged                                                           | Diarect                                                        |           |
| PM/ScI-100 (duplicate)                    | Human PM/ScI-100, recombinant, His-tagged                                                           | Diarect                                                        |           |
| PR3-Aro                                   | Proteinase 3 antigen (cANCA antigen) from human neutrophils                                         | Arodia Arotech Diagnostics                                     |           |
| PR3-IV                                    | Proteinase 3 antigen (cANCA antigen) from human promyelocytic cell line                             | Immunovision                                                   |           |
| Ribo P                                    | Human ribosomal phosphoprotein P0, recombinant, His-tagged                                          | Diarect                                                        |           |
| ScI-70 truncated                          | Human DNA topoisomerase I (sclerodoma antigen 70), recombinant, His-tagged                          | Diarect                                                        |           |
| SMA-3000                                  | Smith antigen from bovine thymus and/or spleen                                                      | Immunovision                                                   |           |
| SRC-3000                                  | Smith antigen/ribonucleoprotein complex from rabbit and calf thymus                                 | Immunovision                                                   |           |
| ssDNA                                     | Single-stranded DNA from calf thymus                                                                | Sigma                                                          |           |
| Thyroglobulin                             | Human thyroglobulin, native                                                                         | Diarect                                                        |           |
| TPO                                       | Human thyroid peroxidase, recombinant, His-tagged                                                   | Diarect                                                        |           |
| TPO (duplicate)                           | Human thyroid peroxidase, recombinant, His-tagged                                                   | Diarect                                                        |           |
| U1-snRNP-A                                | Human small nuclear ribonucleoprotein complex A, recombinant, His-tagged                            | Diarect                                                        |           |
| U1-snRNP-A (duplicate)                    | Human small nuclear ribonucleoprotein complex A, recombinant, His-tagged                            | Diarect                                                        |           |
| U1-snRNP-C                                | Human small nuclear ribonucleoprotein complex C, recombinant, His-tagged                            | Diarect                                                        |           |
| U-snRNP-B/B'                              | Human small nuclear ribonucleoprotein complex B/B', recombinant, His-tagged                         | Diarect                                                        |           |

## Supplemental References

1. Bahr SL. Peptide markers for the HIV-1 neutralizing antibody 4E10 [M.Sc. thesis]. Burnaby: Simon Fraser University; 2004.
2. Connor RI, Chen BK, Choe S, Landau NR. Vpr is required for efficient replication of human immunodeficiency virus type-1 in mononuclear phagocytes. *Virology* 1995,**206**:935-944.
3. Lodes MJ, Cong Y, Elson CO, Mohamath R, Landers CJ, Targan SR, *et al.* Bacterial flagellin is a dominant antigen in Crohn disease. *J Clin Invest* 2004,**113**:1296-1306.
4. Maggio-Price L, Shows D, Waggie K, Burich A, Zeng W, Escobar S, *et al.* Helicobacter bilis infection accelerates and H. hepaticus infection delays the development of colitis in multiple drug resistance-deficient (mdr1a<sup>-/-</sup>) mice. *Am J Pathol* 2002,**160**:739-751.
5. Menendez A, Chow KC, Pan OC, Scott JK. Human immunodeficiency virus type 1-neutralizing monoclonal antibody 2F5 is multispecific for sequences flanking the DKW core epitope. *J Mol Biol* 2004,**338**:311-327.
6. Montero M. Antigenicity and immunogenicity of the membrane proximal external region of the HIV-1 envelope protein gp41 [Ph.D. thesis]. Burnaby: Simon Fraser University; 2007.
7. van Houten NE, Henry KA, Smith GP, Scott JK. Engineering filamentous phage carriers to improve focusing of antibody responses against peptides. *Vaccine* 2010,**28**:2174-2185.

8. Zwick MB, Kelleher R, Jensen R, Labrijn AF, Wang M, Quinnan GV, Jr., *et al.* A novel human antibody against human immunodeficiency virus type 1 gp120 is V1, V2, and V3 loop dependent and helps delimit the epitope of the broadly neutralizing antibody immunoglobulin G1 b12. *Journal of virology* 2003,**77**:6965-6978.
